# Supplementary material for: Microbial distribution and variation in produced water from separators to storage tanks of shale gas wells in Sichuan Basin, China
Source: Royal Society of Chemistry journal article supplement (doi:10.1039/c6ew00286b), 2017-01-01
Supplement: c6ew00286b1.pdf [file c6ew00286b1.pdf]

1 Environmental Science: Water Research & Technology  
2 **Microbial distribution and variation in**  
3 **produced water from separator to storage tank**  
4 **of shale gas wells in Sichuan Basin, China**

5 **Supporting Information**

6 Yimeng Zhang <sup>1</sup>, Zhisheng Yu <sup>1\*</sup>, Hongxun Zhang <sup>1</sup>, Ian P. Thompson <sup>2</sup>

7 <sup>1</sup> College of Resources and Environment, University of Chinese Academy of Sciences,  
8 19 A Yuquan Road, Beijing 100049, P.R. China

9 <sup>2</sup> Department of Engineering Science, University of Oxford, Parks Road, Oxford OX1  
10 3PJ, UK

11 \*Corresponding Author. Tel: +86 10 88256057; fax: +86 10 88256057; E-mail:

12 yuzs@ucas.ac.cn; College of Resources and Environment, University of Chinese  
13 Academy of Sciences, 19 A Yuquan Road, Beijing 100049, P.R. China

14  
15 This SI includes complete documentation of sequencing data processing, PCR  
16 conditions for sequencing, reaction mixture and conditions of qPCR, microbial  
17 diversity estimates (Table S1), rarefaction curves of OTUs (Fig. S1), phylogenetic  
18 classification for MiSeq Sequencing data at the phylum level (Fig. S2), unweighted  
19 pair group method with arithmetic mean (UPGMA) tree of beta diversity based on  
20 OTUs (Fig. S3), standard curve of bacteria, archaea, fungi and *dsrA* of qPCR (Fig.  
21 S4), and sampling schematic (Fig. S5).

### 22 **2.3. DNA extraction and sequencing**

23 The PCR reactions were carried out on a GeneAmp 9700 PCR system (Applied  
24 Biosystems, Foster City, CA, USA) with the following conditions: 95 °C for 2 min;  
25 followed by 30 cycles of 95 °C for 30 s, 55 °C for 30 s, and 72 °C for 60 s; and a final  
26 extension at 72 °C for 5 min.

### 27 **2.4. Analysis of sequencing data**

28 Initially, low-quality regions ( $Q < 20$ ) were trimmed from the 5' end of sequences and  
29 paired ends were merged into contiguous sequences with FLASH in terms of the  
30 minimum overlap length of 10 base pair and the maximum error ratio of 0.2.  
31 Sequences were demultiplexed, and a further round of quality control was conducted  
32 to remove sequences containing ambiguous bases and reads containing low quality  
33 bases ( $Q < 25$ ). Non-repetitive sequences were picked from the remaining high-quality  
34 sequences along with removing singletons. Operational taxonomic units (OTUs) were  
35 defined as clusters of 97% sequence similarity with removing chimeras using Usearch  
36 (version 7.1). Taxonomy was assigned using RDP Classifier against Silva database.  
37 The resultant OUT abundance tables were rarefied to an even number of sequences  
38 per sample to ensure an equal sampling depth.

39 Bartlett-test in R software was conducted first to confirm that if the data of alpha  
40 diversity index (ACE and Shannon) met the requirements of the ANOVA analysis.  
41 The results showed that  $p$  value of Bartlett-tests ranged between 0.162 and 0.992.  
42 Therefore, ANOVA analysis could be performed on alpha diversity index.

### 43 **2.5. Quantitative PCR (qPCR)**

44 Template DNA (1  $\mu\text{L}$ ) was used in a reaction mixture of 25  $\mu\text{L}$  containing 12.5  $\mu\text{L}$  of  
45 2 $\times$  SYBR Green mix (Fermentas, USA), 1  $\mu\text{L}$  of each primer (10 nM), 0.3  $\mu\text{L}$  bovine  
46 serum albumin (BSA; 10 mg/mL; New England Biolabs, MA, USA), and 9.2  $\mu\text{L}$   
47 ddH<sub>2</sub>O. The PCR was initiated at 95°C for 10 min, followed by 40 cycles of  
48 denaturation for 30 s at 95°C, annealing for 30 s at 58°C, and elongation for 30 s at  
49 72°C. Fluorescence signals were collected at 72°C during the elongation step.

50 **Table S1** Diversity estimates of bacteria, archaea and fungi from separators and  
 51 storage tanks

| Station  | Sample | Reads | OTU <sub>0.03</sub> | ACE | Chao | Coverage(%) | Shannon | Simpson |
|----------|--------|-------|---------------------|-----|------|-------------|---------|---------|
| Bacteria |        |       |                     |     |      |             |         |         |
| GGS1     | GS1    | 16148 | 96                  | 115 | 122  | 99.86       | 2.42    | 0.1426  |
|          | WT1    | 8088  | 103                 | 111 | 116  | 99.84       | 3.22    | 0.086   |
| GGS2     | GS2    | 11555 | 87                  | 156 | 134  | 99.73       | 1.68    | 0.3395  |
|          | WT2    | 9129  | 84                  | 93  | 93   | 99.87       | 3.06    | 0.775   |
| GGS3     | GS3    | 8569  | 44                  | 55  | 53   | 99.88       | 1.75    | 0.2749  |
|          | WT3    | 7546  | 86                  | 105 | 102  | 99.75       | 1.94    | 0.3648  |
| GGS4     | GS4a   | 9202  | 90                  | 104 | 109  | 99.80       | 2.73    | 0.1085  |
|          | GS4b   | 11064 | 159                 | 175 | 172  | 99.78       | 3.28    | 0.0669  |
|          | WT4    | 8220  | 130                 | 145 | 145  | 99.76       | 3.59    | 0.0476  |
| GGS5     | WT5    | 10728 | 95                  | 107 | 104  | 99.86       | 2.23    | 0.2144  |
| GGS6     | WT6    | 7707  | 84                  | 94  | 97   | 99.81       | 2.88    | 0.0908  |
| Archaea  |        |       |                     |     |      |             |         |         |
| GGS1     | GS1    | 12917 | 7                   | 8   | 7    | 99.99       | 0.13    | 0.9555  |
|          | WT1    | 9227  | 4                   | 0   | 4    | 99.99       | 0.48    | 0.7135  |
| GGS2     | GS2    | 13871 | 6                   | 6   | 6    | 99.99       | 0.46    | 0.7507  |
|          | WT2    | 17784 | 7                   | 7   | 7    | 99.99       | 0.4     | 0.8184  |
| GGS3     | GS3    | 12073 | 10                  | 13  | 11   | 99.98       | 0.38    | 0.8414  |
|          | WT3    | 13228 | 5                   | 0   | 5    | 99.99       | 0.39    | 0.839   |
| GGS4     | GS4a   | 14290 | 9                   | 9   | 9    | 99.99       | 0.87    | 0.5464  |
|          | GS4b   | 10371 | 8                   | 9   | 8    | 99.99       | 0.32    | 0.8377  |
|          | WT4    | 16161 | 10                  | 11  | 11   | 99.99       | 0.05    | 0.9871  |
| GGS5     | WT5    | 17779 | 4                   | 4   | 4    | 99.99       | 0.26    | 0.8803  |
| GGS6     | WT6    | 15220 | 13                  | 13  | 13   | 99.99       | 0.74    | 0.6346  |
| Fungi    |        |       |                     |     |      |             |         |         |
| GGS1     | GS1    | BDL   |                     |     |      |             |         |         |
|          | WT1    | 19643 | 19                  | 20  | 19   | 99.99       | 2.13    | 0.1858  |
| GGS2     | GS2    | 14654 | 18                  | 19  | 18   | 99.99       | 1.39    | 0.42    |
|          | WT2    | 14964 | 23                  | 23  | 23   | 99.99       | 2.12    | 0.159   |
| GGS3     | GS3    | BDL   |                     |     |      |             |         |         |
|          | WT3    | 13348 | 13                  | 13  | 13   | 99.99       | 1.42    | 0.3935  |
| GGS4     | GS4a   | 15196 | 20                  | 20  | 20   | 99.99       | 2.13    | 0.1524  |
|          | GS4b   | 18666 | 26                  | 27  | 26   | 99.99       | 1.64    | 0.3679  |
|          | WT4    | 17508 | 29                  | 29  | 29   | 99.99       | 1.82    | 0.252   |
| GGS5     | WT5    | 11643 | 20                  | 21  | 20   | 99.99       | 1.57    | 0.3583  |
| GGS6     | WT6    | 16324 | 21                  | 22  | 21   | 99.99       | 1.64    | 0.2632  |

52 <sup>a</sup> Diversity and richness estimates are based on  $\geq 97\%$  sequence identity. <sup>b</sup> BDL,  
 53 below detection limit. The abbreviations of the samples are the same as those used in  
 54 Table 1

55

56

57

58

59

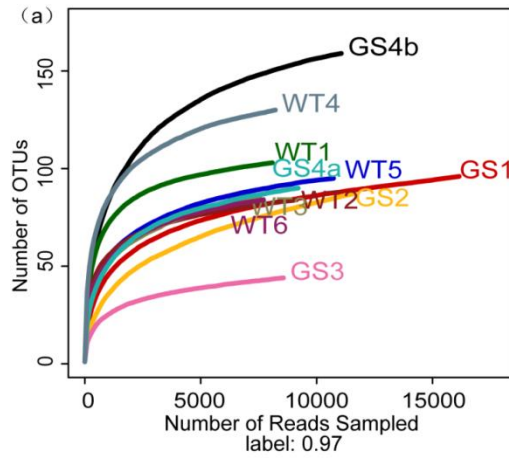

60

61

62

63

64

65

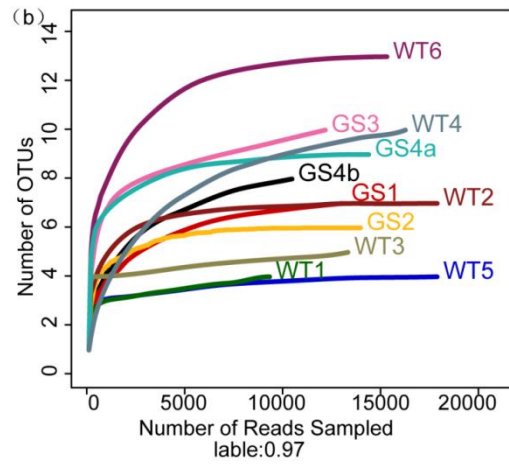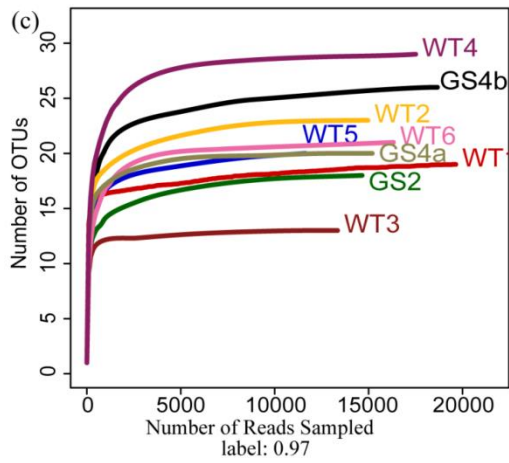

66

67 **Fig. S1** Rarefaction curves of operational taxonomic units (OTUs) for bacteria (a),

68 archaea (b), and fungi (c) in separator and storage tank samples. The abbreviations of

69 the samples are the same as those used in Fig. 2

70

71

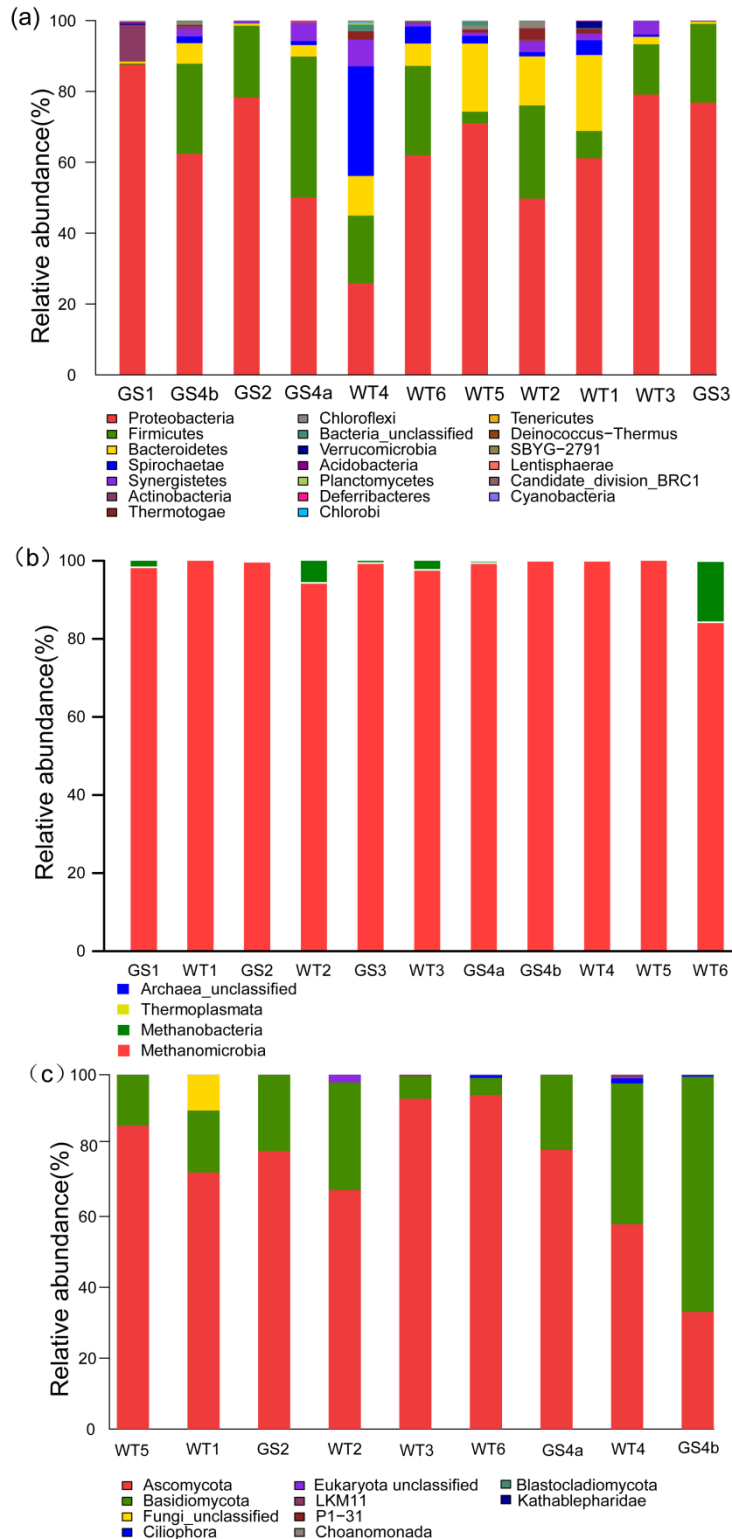

72 **Fig. S2** Phylogenetic classification for MiSeq Sequencing of bacteria (a) at the  
 73 phylum level, archaea (b) at the class level and of fungi (c) at the phylum level  
 74 obtained from the Silva database project classifier analysis. Fungi were not detected  
 75 in GS1 and GS3. The abbreviations of the samples are the same as those used in Fig. 2

76  
77  
78  
79  
80  
81  
82  
83  
84  
85  
86  
87

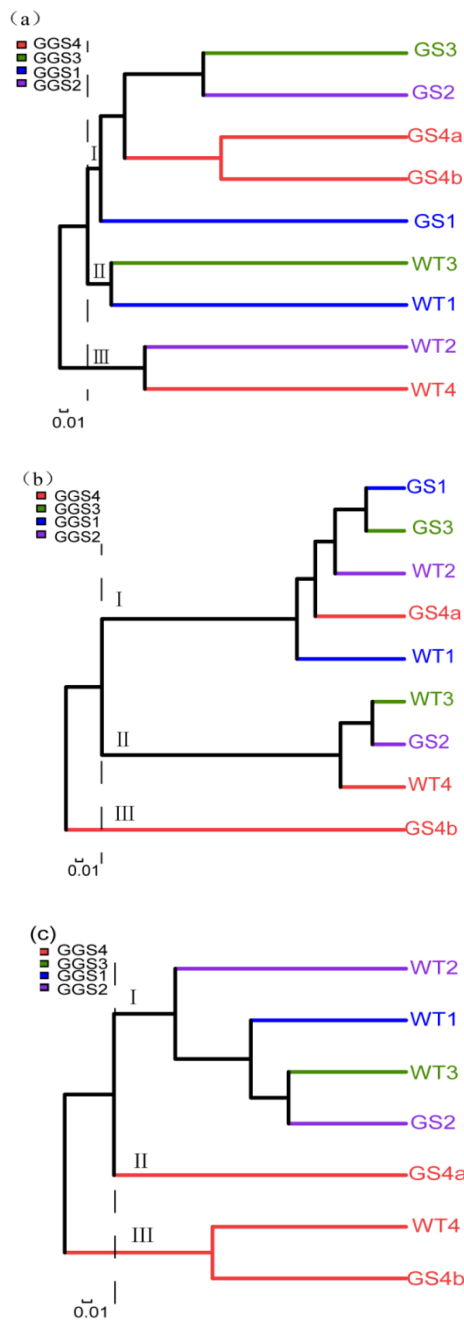

88  
89  
90  
91  
92  
93  
94

**Fig. S3** Unweighted pair group method with arithmetic mean (UPGMA) tree of beta diversity based on operational taxonomic units (OTUs) for bacteria (a), archaea (b), and fungi (c) in the separator and storage tanks. GGS1, GGS2, GGS3 and GGS4 were compared because they all had both separators and storage tanks. Fungi were not detected in GS1 and GS3. The abbreviations of the samples are the same as those used in Fig. 2

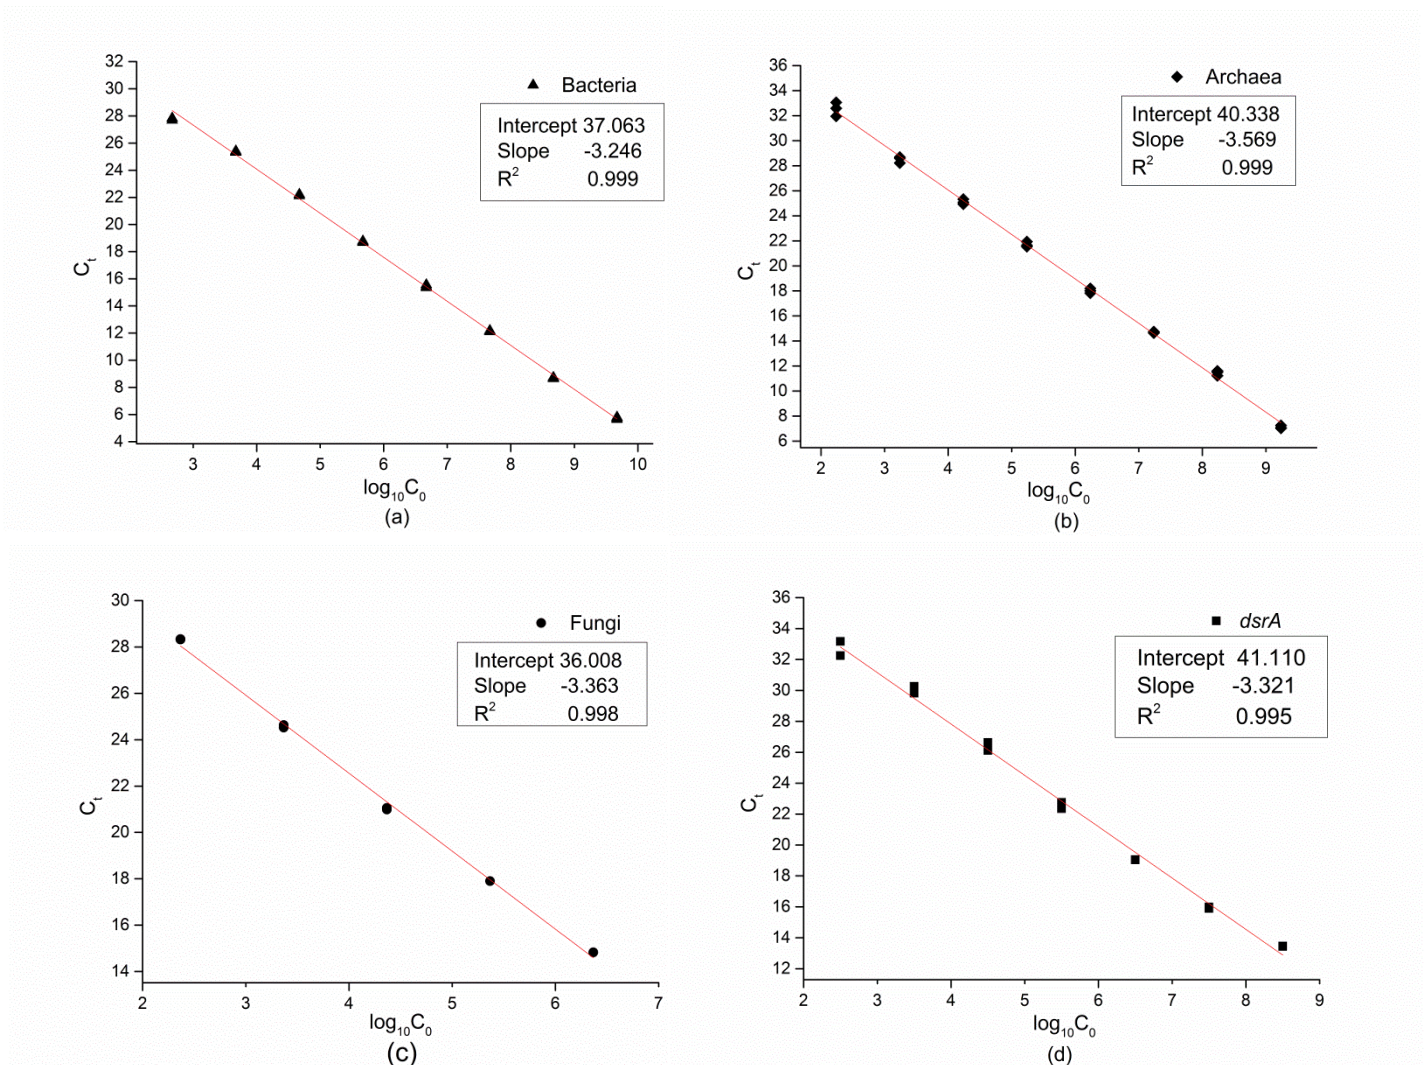

96

97 **Fig. S4** Standard curve of qPCR for bacteria (a), archaea (b), fungi (c) and *dsrA* genes

98 (d).

99

100

101

102

103

104

105

106

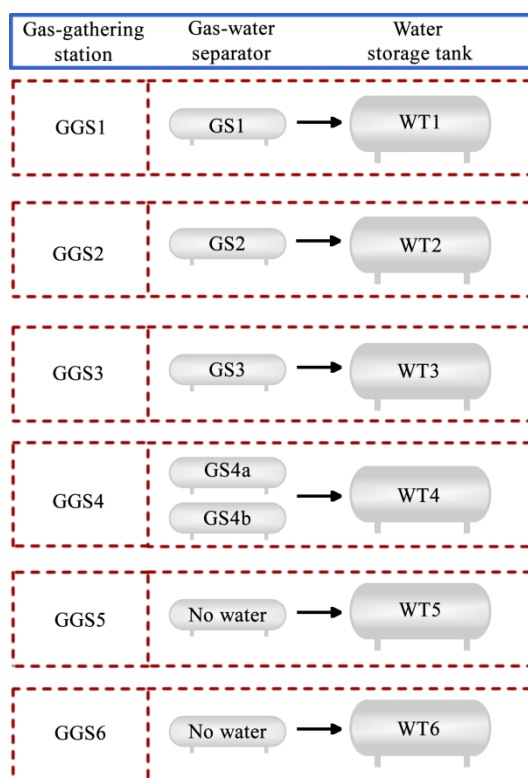

107

108 **Fig. S5** Schematic diagram of sampling sites. There was no enough water to be  
 109 collected in separators at gas-gathering station 5 (GGs5) and 6 (GGs6), thus only  
 110 water storage tank samples were collected. The abbreviations of the samples are the  
 111 same as those used in Fig. 2.
